# Supplementary material for: Molecular and physiological characterization of the effects of auxin-enriched rootstock on grafting
Source: PubMed Central journal article supplement (PMC8012700; doi:10.1038/s41438-021-00509-y), 2021-04-01
Supplement: 41438_2021_509_MOESM2_ESM.pdf [file 41438_2021_509_MOESM2_ESM.pdf]

WT scions were grafted on WT and *iaaM* rootstock, separately. Scion and rootstock tissues were harvested at 0 hour, 24 hours and 96 hours, separately. Note: changes of gene expression level in WT scions on WT rootstock were presented in black; while WT scions on *iaaM* rootstock in red. Similarly, changes of gene expression level in WT rootstock were presented in black, while in *iaaM* rootstock in red

| Tissues                                           | Gene name                          | Gene ID                 | Changes in expression level in fold |        |        |       |        | Gene function |                                          |
|---------------------------------------------------|------------------------------------|-------------------------|-------------------------------------|--------|--------|-------|--------|---------------|------------------------------------------|
|                                                   |                                    |                         | 0 hr                                | 24 hrs | 96 hrs | 0 hr  | 24 hrs |               | 96 hrs                                   |
| <b>Callus formation related genes</b>             |                                    |                         |                                     |        |        |       |        |               |                                          |
| WT scions on WT or <i>iaaM</i> rootstocks         |                                    |                         |                                     |        |        |       |        |               |                                          |
|                                                   | WIND1                              | Nitab4.5_0004997g0010.1 | 1.0                                 | 1.0    | 20.5   | 31.1  | 7.7    | 23.9          | wound induced; callus formation          |
|                                                   | LBD18                              | Nitab4.5_0007537g0010.1 | 1.0                                 | 1.0    | 2.3    | 2.9   | 1.7    | 1.6           | auxin and lateral root development       |
|                                                   | LBD17                              | Nitab4.5_0004192g0020.1 | 1.0                                 | 1.0    | 3.3    | 28.2  | 14.2   | 80.7          | auxin and lateral root development       |
|                                                   | LBD16                              | Nitab4.5_0000086g0170.1 | 1.0                                 | 1.0    | 6.5    | 22.8  | 13.4   | 65.4          | auxin and lateral root development       |
|                                                   | Histone H4                         | Nitab4.5_0000270g0260.1 | 1.0                                 | 1.0    | 1.9    | 1.3   | 1.2    | 1.7           | cell division                            |
|                                                   | Cyclin-A1-1                        | Nitab4.5_0006720g0060.1 | 1.0                                 | 1.0    | 1.2    | 1.2   | 1.9    | 2.4           | cell division                            |
|                                                   | Cyclin-A2-2                        | Nitab4.5_0007182g0040.1 | 1.0                                 | 1.0    | 2.1    | 1.6   | 1.5    | 2.1           | cell division                            |
|                                                   | Cyclin-B2-3                        | Nitab4.5_0010763g0020.1 | 1.0                                 | 1.0    | 1.2    | 1.1   | 1.7    | 2.4           | cell division                            |
|                                                   | Cyclin-B2-4                        | Nitab4.5_0000588g0060.1 | 1.0                                 | 1.0    | 1.3    | 1.3   | 1.8    | 2.6           | cell division                            |
|                                                   | Cyclin-D3-1                        | Nitab4.5_0006486g0030.1 | 1.0                                 | 1.0    | 0.9    | 2.0   | 2.0    | 3.4           | cell division                            |
|                                                   | G2/mitotic-specific cyclin-1       | Nitab4.5_0002967g0030.1 | 1.0                                 | 1.0    | 1.0    | 1.1   | 2.0    | 2.8           | cell division                            |
|                                                   | G2/mitotic-specific cyclin-2       | Nitab4.5_0008332g0040.1 | 1.0                                 | 1.0    | 2.6    | 2.4   | 3.2    | 4.4           | cell division                            |
|                                                   | G2/mitotic-specific cyclin S13-6   | Nitab4.5_0000428g0070.1 | 1.0                                 | 1.0    | 1.1    | 1.0   | 1.5    | 2.0           | cell division                            |
|                                                   | Cyclin-P3-1                        | Nitab4.5_0006928g0020.1 | 1.0                                 | 1.0    | 3.0    | 2.3   | 4.7    | 1.9           | cell division                            |
| WT or <i>iaaM</i> rootstocks with WT scions       |                                    |                         |                                     |        |        |       |        |               |                                          |
|                                                   | WIND1                              | Nitab4.5_0004997g0010.1 | 1.0                                 | 4.2    | 7.9    | 12.9  | 16.2   | 22.5          | wound induced; callus formation          |
|                                                   | LBD18                              | Nitab4.5_0007537g0010.1 | 1.0                                 | 1.9    | 0.6    | 1.6   | 0.3    | 1.1           | auxin and lateral root development       |
|                                                   | LBD17                              | Nitab4.5_0004192g0020.1 | 1.0                                 | 2.2    | 0.1    | 0.9   | 0      | 2.2           | auxin and lateral root development       |
|                                                   | LBD16                              | Nitab4.5_0000086g0170.1 | 1.0                                 | 1.2    | 0.1    | 0.1   | 0      | 2.0           | auxin and lateral root development       |
|                                                   | Histone H4                         | Nitab4.5_0000270g0260.1 | 1.0                                 | 2.3    | 3.2    | 9.3   | 2.5    | 6.3           | cell division                            |
|                                                   | Cyclin-A1-1                        | Nitab4.5_0006720g0060.1 | 1.0                                 | 1.3    | 1.4    | 4.7   | 5.5    | 6.0           | cell division                            |
|                                                   | Cyclin-A2-2                        | Nitab4.5_0007182g0040.1 | 1.0                                 | 1.2    | 2.0    | 8.2   | 5.6    | 7.0           | cell division                            |
|                                                   | Cyclin-B2-3                        | Nitab4.5_0010763g0020.1 | 1.0                                 | 1.4    | 0.7    | 3.2   | 2.8    | 4.7           | cell division                            |
|                                                   | Cyclin-B2-4                        | Nitab4.5_0000588g0060.1 | 1.0                                 | 1.1    | 0.8    | 3.2   | 2.7    | 4.1           | cell division                            |
|                                                   | Cyclin-D3-1                        | Nitab4.5_0006486g0030.1 | 1.0                                 | 1.7    | 3.0    | 3.7   | 3.0    | 7.3           | cell division                            |
|                                                   | G2/mitotic-specific cyclin-1       | Nitab4.5_0002967g0030.1 | 1.0                                 | 0.5    | 0.6    | 3.3   | 2.6    | 3.5           | cell division                            |
|                                                   | G2/mitotic-specific cyclin-2       | Nitab4.5_0008332g0040.1 | 1.0                                 | 1.6    | 2.0    | 6.2   | 5.8    | 7.2           | cell division                            |
|                                                   | G2/mitotic-specific cyclin S13-6   | Nitab4.5_0000428g0070.1 | 1.0                                 | 1.3    | 1.1    | 3.8   | 3.0    | 3.7           | cell division                            |
|                                                   | Cyclin-P3-1                        | Nitab4.5_0006928g0020.1 | 1.0                                 | 0.5    | 1.5    | 1.2   | 2.3    | 2.0           | cell division                            |
| <b>Vascular development related genes</b>         |                                    |                         |                                     |        |        |       |        |               |                                          |
| WT scions on WT or <i>iaaM</i> rootstocks         |                                    |                         |                                     |        |        |       |        |               |                                          |
|                                                   | Expansin-A15                       | Nitab4.5_0000141g0090.1 | 1.0                                 | 1.0    | 36.5   | 17.5  | 10.6   | 11.6          | cell wall loosening                      |
|                                                   | Expansin-like B1                   | Nitab4.5_0000500g0210.1 | 1.0                                 | 1.0    | 123.1  | 315.0 | 42.1   | 219.9         | cell wall loosening                      |
|                                                   | Expansin-like A1                   | Nitab4.5_0001274g0040.1 | 1.0                                 | 1.0    | 1.7    | 3.4   | 3.9    | 3.0           | cell wall loosening                      |
|                                                   | Expansin-like B1                   | Nitab4.5_0003567g0050.1 | 1.0                                 | 1.0    | 124.4  | 253.9 | 57.2   | 176.9         | cell wall loosening                      |
|                                                   | Expansin-A15                       | Nitab4.5_0005766g0020.1 | 1.0                                 | 1.0    | 32.2   | 15.4  | 9.9    | 3.0           | cell wall loosening                      |
|                                                   | Cellulose synthase-like protein E1 | Nitab4.5_0007779g0010.1 | 1.0                                 | 1.0    | 3.8    | 14.5  | 5.2    | 14.6          | cell wall construction                   |
|                                                   | Caffeoyl-CoA O-methyltransferase 1 | Nitab4.5_0002694g0030.1 | 1.0                                 | 1.0    | 2.2    | 3.5   | 1.1    | 3.8           | cell wall reinforcement                  |
|                                                   | Caffeoyl-CoA O-methyltransferase 3 | Nitab4.5_0002765g0010.1 | 1.0                                 | 1.0    | 1.0    | 2.0   | 0.8    | 2.0           | cell wall reinforcement                  |
|                                                   | Laccase-4                          | Nitab4.5_0000119g0250.1 | 1.0                                 | 1.0    | 1.5    | 0.4   | 1.3    | 0.7           | secondary xylem cell wall lignification. |
|                                                   | HCA2                               | Nitab4.5_0000033g0600.1 | 1.0                                 | 1.0    | 1.6    | 2.5   | 1.5    | 1.3           | phloem formation                         |
|                                                   | NAC096                             | Nitab4.5_0003100g0030.1 | 1.0                                 | 1.0    | 23.9   | 71.6  | 25.9   | 21.8          | vascularreconnection                     |
|                                                   | NAC071                             | Nitab4.5_0014378g0010.1 | 1.0                                 | 1.0    | 22.9   | 59.6  | 37.4   | 23.7          | vascularreconnection                     |
|                                                   | VAN3-binding protein               | Nitab4.5_0000678g0030.1 | 1.0                                 | 1.0    | 1.1    | 1.7   | 2.2    | 1.4           | xylem formation                          |
|                                                   | TMO6                               | Nitab4.5_0000533g0150.1 | 1.0                                 | 1.0    | 2.3    | 5.6   | 7.1    | 4.5           | provasculature formation                 |
|                                                   | Peroxidase 12                      | Nitab4.5_0000099g0090.1 | 1.0                                 | 1.0    | 3.8    | 13.5  | 2.3    | 22.5          | second cell wall thickening              |
| WT or <i>iaaM</i> rootstocks with WT scions       |                                    |                         |                                     |        |        |       |        |               |                                          |
|                                                   | Expansin-A15                       | Nitab4.5_0000141g0090.1 | 1.0                                 | 64.0   | 126.6  | 5.7   | 30.2   | 15.0          | cell wall loosening                      |
|                                                   | Expansin-like B1                   | Nitab4.5_0000500g0210.1 | 1.0                                 | 15.2   | 37.6   | 2.1   | 1.7    | 4.5           | cell wall loosening                      |
|                                                   | Expansin-like A1                   | Nitab4.5_0001274g0040.1 | 1.0                                 | 1.1    | 1.0    | 1.7   | 1.4    | 1.5           | cell wall loosening                      |
|                                                   | Expansin-like B1                   | Nitab4.5_0003567g0050.1 | 1.0                                 | 175.1  | 205.6  | 20.8  | 62.0   | 72.7          | cell wall loosening                      |
|                                                   | Expansin-A15                       | Nitab4.5_0005766g0020.1 | 1.0                                 | 13.7   | 3.7    | 6.1   | 3.7    | 13.2          | cell wall loosening                      |
|                                                   | Cellulose synthase-like protein E1 | Nitab4.5_0007779g0010.1 | 1.0                                 | 4.5    | 1.4    | 3.5   | 2.5    | 5.4           | cell wall construction                   |
|                                                   | Caffeoyl-CoA O-methyltransferase 1 | Nitab4.5_0002694g0030.1 | 1.0                                 | 6.2    | 4.2    | 8.2   | 1.3    | 7.2           | cell wall reinforcement                  |
|                                                   | Caffeoyl-CoA O-methyltransferase 3 | Nitab4.5_0002765g0010.1 | 1.0                                 | 1.9    | 1.5    | 2.2   | 0.6    | 2.2           | cell wall reinforcement                  |
|                                                   | Laccase-4                          | Nitab4.5_0000119g0250.1 | 1.0                                 | 0.1    | 0.4    | 0.1   | 0.0    | 0.1           | secondary xylem cell wall lignification. |
|                                                   | HCA2                               | Nitab4.5_0000033g0600.1 | 1.0                                 | 0.8    | 3.3    | 8.2   | 2.2    | 7.1           | phloem formation                         |
|                                                   | NAC096                             | Nitab4.5_0003100g0030.1 | 1.0                                 | 0.8    | 3.6    | 11.7  | 1.2    | 11.9          | vascularreconnection                     |
|                                                   | NAC071                             | Nitab4.5_0014378g0010.1 | 1.0                                 | 1.0    | 8.6    | 13.6  | 2.6    | 8.3           | vascularreconnection                     |
|                                                   | VAN3-binding protein               | Nitab4.5_0000678g0030.1 | 1.0                                 | 0.5    | 0.9    | 1.2   | 2.0    | 1.9           | xylem formation                          |
|                                                   | TMO6                               | Nitab4.5_0000533g0150.1 | 1.0                                 | 0.9    | 0.3    | 1.2   | 1.2    | 2.2           | provasculature formation                 |
|                                                   | Peroxidase 12                      | Nitab4.5_0000099g0090.1 | 1.0                                 | 3.1    | 7.3    | 37.8  | 1.2    | 24.3          | second cell wall thickening              |
| <b>Ethylene biosynthesis and responsive genes</b> |                                    |                         |                                     |        |        |       |        |               |                                          |
| WT scions on WT or <i>iaaM</i> rootstocks         |                                    |                         |                                     |        |        |       |        |               |                                          |
|                                                   | ACCH                               | Nitab4.5_0002916g0060.1 | 1.0                                 | 1.0    | 2.1    | 15.7  | 24.3   | 72.1          | ethylene synthesis                       |
|                                                   | NAC71                              | Nitab4.5_0014378g0010.1 | 1.0                                 | 1.0    | 22.9   | 59.6  | 37.4   | 23.7          | ethylene signaling pathway               |
|                                                   | WRKY transcription factor 33       | Nitab4.5_0001226g0020.1 | 1.0                                 | 1.0    | 13.0   | 33.4  | 14.3   | 34.2          | ethylene signaling pathway               |
|                                                   | ERF92                              | Nitab4.5_0000777g0080.1 | 1.0                                 | 1.0    | 15.1   | 35.1  | 12.1   | 17.2          | ethylene signaling pathway               |
|                                                   | TIR1                               | Nitab4.5_0008145g0010.1 | 1.0                                 | 1.0    | 0.4    | 0.9   | 0.9    | 1.1           | ethylene signaling                       |
|                                                   | Ethylene receptor 2                | Nitab4.5_0004443g0040.1 | 1.0                                 | 1.0    | 1.1    | 2.5   | 2.3    | 3.6           | ethylene receptor                        |
|                                                   | WRKY transcription factor 33       | Nitab4.5_0000047g0140.1 | 1.0                                 | 1.0    | 23.8   | 50.1  | 27.3   | 65.9          | ethylene signaling pathway               |
|                                                   | ACS                                | Nitab4.5_0000915g0150.1 | -                                   | -      | -      | -     | -      | -             | ethylene synthesis                       |
|                                                   | ACS                                | Nitab4.5_0000373g0240.1 | 1.0                                 | 1.0    | 3.0    | 7.9   | 5.9    | 4.5           | ethylene synthesis                       |
|                                                   | ERF5                               | Nitab4.5_0007739g0010.1 | 1.0                                 | 1.0    | 1.9    | 4.5   | 0.9    | 3.3           | ethylene signaling pathway               |
| WT or <i>iaaM</i> rootstocks with WT scions       |                                    |                         |                                     |        |        |       |        |               |                                          |
|                                                   | ACCH                               | Nitab4.5_0002916g0060.1 | 1.0                                 | 2.6    | 7.4    | 9.8   | 24.3   | 26.9          | ethylene synthesis                       |
|                                                   | NAC71                              | Nitab4.5_0014378g0010.1 | 1.0                                 | 1.0    | 8.6    | 13.6  | 2.6    | 8.3           | ethylene signaling pathway               |
|                                                   | WRKY transcription factor 33       | Nitab4.5_0001226g0020.1 | 1.0                                 | 1.3    | 7.3    | 11.3  | 5.4    | 11.7          | ethylene signaling pathway               |
|                                                   | ERF92                              | Nitab4.5_0000777g0080.1 | 1.0                                 | 1.9    | 10.9   | 8.7   | 6.8    | 5.6           | ethylene signaling pathway               |
|                                                   | TIR1                               | Nitab4.5_0008145g0010.1 | 1.0                                 | 0.7    | 0.2    | 0.2   | 0.2    | 0.5           | ethylene signaling                       |

|                              |                         |     |      |       |       |      |       |                            |
|------------------------------|-------------------------|-----|------|-------|-------|------|-------|----------------------------|
| Ethylene receptor 2          | Nitab4.5_0004443g0040.1 | 1.0 | 0.5  | 1.1   | 1.5   | 1.5  | 1.9   | ethylene receptor          |
| WRKY transcription factor 33 | Nitab4.5_0000047g0140.1 | 1.0 | 15.5 | 100.6 | 110.4 | 72.7 | 153.6 | ethylene signaling pathway |
| ACS                          | Nitab4.5_0000915g0150.1 | 1.0 | 0.0  | 115.9 | 386.9 | 0.0  | 134.0 | ethylene synthesis         |
| ACS                          | Nitab4.5_0000373g0240.1 | 1.0 | 0.9  | 1.1   | 2.4   | 0.8  | 3.5   | ethylene synthesis         |
| ERF5                         | Nitab4.5_0007739g0010.1 | 1.0 | 1.1  | 2.6   | 5.1   | 2.1  | 3.8   | ethylene signaling pathway |
